# Supplementary material for: Influence of Gender on Occurrence of Aseptic Loosening and Recurrent PJI after Revision Total Knee Arthroplasty
Source: MDPI journal article supplement (doi:10.3390/osteology1020010), 2021-05-17
Supplement: s1 [file s1]

**Supplemental Table S1.** Pathogens in Patients at Time of Periprosthetic Joint Infection

| Descriptive                      | All Outcomes |            |            |         | Prosthesis Survival |            |         | Aseptic Loosening |           |         | Recurrent PJI |           |         |
|----------------------------------|--------------|------------|------------|---------|---------------------|------------|---------|-------------------|-----------|---------|---------------|-----------|---------|
|                                  | All Patients | Male       | Female     | p Value | Male                | Female     | p Value | Male              | Female    | p Value | Male          | Female    | p Value |
| Coagulase-negative staphylococci | 49.0% (24)   | 50.0% (30) | 49.0% (24) | 0.964   | 53.1% (17)          | 57.1% (20) | 0.816   | 57.1% (4)         | 46.7% (7) | 0.567   | 25.0% (3)     | 30.0% (3) | 0.947   |
| Staphylococcus aureus            | 16.3% (8)    | 15.0% (9)  | 16.3% (8)  | 0.855   | 18.8% (6)           | 11.4% (4)  | 0.442   | 14.3% (1)         | 6.7% (1)  | 0.502   | 8.3% (1)      | 40.0% (4) | 0.161   |
| Propionibacterium acnes          | 10.2% (5)    | 16.7% (10) | 10.2% (5)  | 0.380   | 9.4% (3)            | 20.0% (7)  | 0.258   | 0.0% (0)          | 13.3% (2) | 0.371   | 16.7% (2)     | 10.0% (1) | 0.596   |
| Streptococci                     | 6.1% (3)     | 1.7% (1)   | 6.1% (3)   | 0.242   | 6.3% (2)            | 2.9% (1)   | 0.514   | 0.0% (0)          | 0.0% (0)  | -       | 8.3% (1)      | 0.0% (0)  | 0.330   |
| Gram-negative bacteria           | 4.1% (2)     | 1.7% (1)   | 4.1% (2)   | 0.450   | 6.3% (2)            | 0.0% (0)   | 0.140   | 0.0% (0)          | 6.7% (1)  | 0.527   | 0.0% (0)      | 0.0% (0)  | -       |
| Other                            | 10.2% (5)    | 16.7% (10) | 10.2% (5)  | 0.386   | 15.6% (5)           | 17.1% (6)  | 0.873   | 0.0% (0)          | 26.7% (4) | 0.206   | 0.0% (0)      | 0.0% (0)  | -       |
| Monomicrobial infection          | 61.2% (30)   | 56.7% (34) | 61.2% (30) | 0.881   | 59.4% (19)          | 51.4% (18) | 0.670   | 71.4% (5)         | 60.0% (9) | 0.554   | 50.0% (6)     | 70.0% (7) | 0.708   |
| Polymicrobial infection          | 16.3% (8)    | 21.7% (13) | 16.3% (8)  | 0.544   | 18.8% (6)           | 28.6% (10) | 0.407   | 0.0% (0)          | 13.3% (2) | 0.371   | 16.7% (2)     | 10.0% (1) | 0.596   |
| Culture-negative                 | 26.5% (13)   | 21.7% (13) | 26.5% (13) | 1.000   | 21.9% (7)           | 20.0% (7)  | 0.872   | 28.6% (2)         | 26.7% (4) | 0.796   | 33.3% (4)     | 20.0% (2) | 0.453   |
