# Supplementary material for: Influence of Gender on Occurrence of Aseptic Loosening and Recurrent PJI after Revision Total Knee Arthroplasty
Source: MDPI journal article supplement (doi:10.3390/osteology1020010), 2021-05-17
Supplement: s1 [file s1]

**Supplemental Table S2.** Laboratory Analysis of Bloodwork and Joint Aspirate and Pathology of Intraoperative Specimens

| Descriptive                            | All Outcomes        |                     |                     |         | Prosthesis Survival |                     |         | Aseptic Loosening   |                    |         | Recurrent PJI       |                     |         |
|----------------------------------------|---------------------|---------------------|---------------------|---------|---------------------|---------------------|---------|---------------------|--------------------|---------|---------------------|---------------------|---------|
|                                        | All Patients        | Male                | Female              | p Value | Male                | Female              | p Value | Male                | Female             | p Value | Male                | Female              | p Value |
| <i>Joint Aspirate</i>                  |                     |                     |                     |         |                     |                     |         |                     |                    |         |                     |                     |         |
| Absolute Cell Number [/ $\mu$ L]       | 20,294 $\pm$ 32,438 | 26,868 $\pm$ 41,471 | 13,719 $\pm$ 16,399 | 0.111   | 23,776 $\pm$ 38,645 | 14,528 $\pm$ 16,263 | 0.377   | 18,818 $\pm$ 36,209 | 8,911 $\pm$ 15,583 | 0.178   | 33,337 $\pm$ 46,363 | 26,499 $\pm$ 16,283 | 0.830   |
| PMN [/ $\mu$ L]                        | 18,398 $\pm$ 29,955 | 24,074 $\pm$ 38,130 | 12,721 $\pm$ 15,734 | 0.166   | 21,708 $\pm$ 35,163 | 13,212 $\pm$ 16,095 | 0.419   | 3,488 $\pm$ 33,519  | 8,507 $\pm$ 14,990 | 0.312   | 32,551 $\pm$ 42,466 | 24,316 $\pm$ 14,940 | 0.787   |
| PMN [%]                                | 64.7 $\pm$ 26.9%    | 63.1 $\pm$ 27.7%    | 66.4 $\pm$ 25.4%    | 0.662   | 64.7 $\pm$ 27.9%    | 65.7 $\pm$ 26.4%    | 0.925   | 52.5 $\pm$ 27.9%    | 62.8 $\pm$ 25.8%   | 0.858   | 57.8 $\pm$ 26.4%    | 81.6 $\pm$ 12.6%    | 0.235   |
| <i>CRP [mg/L]</i>                      |                     |                     |                     |         |                     |                     |         |                     |                    |         |                     |                     |         |
| Preoperative Prosthesis Removal        | 39.8 $\pm$ 59.2     | 50.7 $\pm$ 77.1     | 31.2 $\pm$ 36.4     | 0.092   | 47.8 $\pm$ 77.6     | 31.0 $\pm$ 33.5     | 0.264   | 41.2 $\pm$ 73.8     | 21.2 $\pm$ 33.5    | 0.128   | 56.2 $\pm$ 79.2     | 46.7 $\pm$ 43.4     | 0.761   |
| Postoperative Prosthesis Removal       | 9.9 $\pm$ 13.4      | 8.4 $\pm$ 7.6       | 11.0 $\pm$ 16.5     | 0.316   | 9.8 $\pm$ 8.5       | 10.5 $\pm$ 12.1     | 0.789   | 3.9 $\pm$ 8.2       | 12.5 $\pm$ 17.5    | 0.445   | 6.7 $\pm$ 4.6       | 10.7 $\pm$ 8.9      | 0.246   |
| Preoperative Prosthesis Reimplantation | 49.3 $\pm$ 33.2     | 54.7 $\pm$ 37.0     | 44.8 $\pm$ 28.6     | 0.149   | 54.9 $\pm$ 36.5     | 45.4 $\pm$ 28.3     | 0.288   | 36.7 $\pm$ 34.2     | 38.7 $\pm$ 29.1    | 0.278   | 60.9 $\pm$ 41.4     | 52.3 $\pm$ 23.3     | 0.619   |
| <i>Pathology</i>                       |                     |                     |                     |         |                     |                     |         |                     |                    |         |                     |                     |         |
| Type I [%] (No. of Patients)           | 19.3% (21)          | 20.4% (10)          | 18.3% (11)          | 0.962   | 15.6% (5)           | 17.1% (6)           | 0.673   | 42.9% (3)           | 57.1% (4)          | 0.531   | 25.0% (3)           | 10.0% (1)           | 0.411   |
| Type II [%] (No. of Patients)          | 37.6% (41)          | 34.7% (17)          | 40.0% (24)          | 0.653   | 37.5% (12)          | 40.0% (14)          | 0.870   | 14.3% (1)           | 71.4% (5)          | 0.426   | 33.3% (4)           | 40.0% (4)           | 0.543   |
| Type III [%] (No. of Patients)         | 25.7% (28)          | 28.6% (14)          | 23.3% (14)          | 0.591   | 31.3% (10)          | 22.9% (8)           | 0.508   | 14.3% (1)           | 42.9% (3)          | 0.770   | 25.0% (3)           | 30.0% (3)           | 0.823   |
| Type IV [%] (No. of Patients)          | 15.6% (17)          | 16.3% (8)           | 15.0% (9)           | 0.862   | 15.6% (5)           | 17.1% (6)           | 0.878   | 28.6% (2)           | 42.9% (3)          | 0.694   | 16.7% (2)           | 0.0% (0)            | 0.197   |
| N/A [%] (No. of Patients)              | 19.3% (21)          | 20.4% (10)          | 18.3% (11)          | 0.366   | 0.0% (0)            | 2.9% (1)            | -       | 0.0% (0)            | 0.0% (0)           | -       | 0.0% (0)            | 10.0% (1)           | 0.273   |
